# Supplementary material
Source: publisher figshare collection journal article supplement (https://frontiersin.figshare.com/ndownloader/files/24232127)
Supplement: Supplementary file 1 [file 24232127]

<?xml version="1.0" encoding="utf-8"?><Error><Code>AuthenticationFailed</Code><Message>Server failed to authenticate the request. Make sure the value of Authorization header is formed correctly including the signature.
RequestId:ab8de55b-801e-003b-48a8-6fe370000000
Time:2020-08-11T06:29:40.8558494Z</Message><AuthenticationErrorDetail>Signed expiry time [Tue, 11 Aug 2020 06:25:46 GMT] must be after signed start time [Tue, 11 Aug 2020 06:29:40 GMT]</AuthenticationErrorDetail></Error>
